# Supplementary material for: Systematic Analysis of Copy Number Variations in the Pathogenic Yeast Candida parapsilosis Identifies a Gene Amplification in RTA3 That is Associated with Drug Resistance
Source: PubMed Central journal article supplement (PMC9600344; doi:10.1128/mbio.01777-22), 2022-09-19
Supplement: mbio.01777-22-s0008.pdf [file mbio.01777-22-s0008.pdf]

**A**

Left breakpoints

Right breakpoints

|   |                                                                |     |                                                            |
|---|----------------------------------------------------------------|-----|------------------------------------------------------------|
| A | acaaaatcttaaccatcaaaatagctcaagTTTTTTATATTTTTTTTCCGTTTATTGAC    | ... | ACCGACTTTTTTGTGTTTGTCTTTGCAttttttcattatTTTTTTTcttcgcctaa   |
| B | gatttactcaaataggtggcccatgtactaAAAAAAACCAATACAGCTCTTCTAACACT    | ... | TATAACTAGAGGTCACCAAAGAAAAGaaaaacaggcattttcagctgatttcaatt   |
| C | tttccaaatntagacctttttcatgtgtaataAACGCCATAATGCCGAATACGTACGGAGAA | ... | AATATAATGTTGGTGTGTGCGTAGCAaaacaccaatgtcgaccagctattccatga   |
| D | tatatgcaaaaaaatcagcctctcctttgCATTTGTGGCTGAATGAAGACCGTAAGCTAT   | ... | ATTGTTGGTGTGTGCGTAGCAAACACcaatgtcgaccagctattccatgacattac   |
| E | gtcaactagaaatagggtttcggagttaaGCAATTTTTGCTGAGATCAATTTACCCAAG    | ... | ATCATTCAGTTCGACTTCACTTTTTTTgcaatttttgggaacattgtgtgcctcc    |
| F | tttgctgcttttagtgccatgtcaactagaAATTAGGGTTTCGGAGTTAAGCAATTTTTG   | ... | ATTTGTATTTTTCTTTACGACTCTAACcactgatggtgggagcgcgaaactacata   |
| G | agcgcctattggagattatgtgctgtttAGTGCCATGTCAACTAGAAATTAGGGTTTC     | ... | CTATTGTGCAGTAATATGTGATTTcagtgttttcttggogttctcatatttgtat    |
| H | gagacaacaggttacagcaattgtagctgcGTTGAATCCCGTTCTATATTCGTTAAAG     | ... | ATACCCATTAGAAAGCAGAGAGAGATatcatgatgocstatggtacaagacataggt  |
| I | ttgagtatgaggaagaggaaccaatacaaaCTAATATAGCCGTATAACGAGAACAAAATA   | ... | TTTGGGGAACATTGCTGTGCCTCCTCGccgctgttatcgtgcatctgtttggcac    |
| J | aggaagctaaagaaggaagttcgaaaaagaGAAAGGCAGATGATACAAAGCTAAGCAAA    | ... | TCATGGATTCATAAAAGAAGGAAGGTgaaactatatcaatggttttttagtgaag    |
| K | caaagattaacaagattaacacaagtggcaATTACAGAAAGACGATTTGGCATTGAATGAA  | ... | ACATGTGTGGTCTATATATGCTAGCATaaaacatctgaatcgtgtacccaagtgt    |
| L | atatgaaaacagctgaaagagctcatatgcCCAATAGATGGTGGGAGCGAATCAAGCTTT   | ... | TATTTGTATTTTTCTTTACGACTCTAAccaactgatggtgggagcgcgaaactacat  |
| M | tcggagttaagcaatttttgctgagatcaaTTTACCCAAGATGTATGTGTATATGCAAAA   | ... | GAAAGAATCATAAAGTGCTCATATCATtttgagctccaaacctttcccggcgaaca   |
| N | tttaccgaagatgtatgtgtatatgcaaaaAAATCAGCCTCTCCTTTGCATTGTGGCTG    | ... | TCTCACCCAGATGGACCAGTCAACCTCaaatagcagcatggactcctacaactactgc |
| O | acgcctaagccgaatacgtacggagaacTGAAAAACAGAGGGTATCATTTGGTGTAAAT    | ... | TTTTCTTGGCGTTCTCATATTTGTATTTtctttacgactctaaccactgatggtgg   |
| P | acgcaaaacttgatgacttgtggtgggatGAAAAATGTTTATGATATTCGTCGCTTACT    | ... | CAAAATTTAGAGGACTTAGCGTGGAGgaaacatgtatggtatacgtcgtttgacac   |

**B**

|       |                                                               |     |                                                            |
|-------|---------------------------------------------------------------|-----|------------------------------------------------------------|
| CNV-1 | accagcttatcaagtgaaaagttttgcaagAGGTCCAGATTCATCAGACCCACAATCATA  | ... | CACACCATTACCCTCCAGCAAACAAAaggactgcacgacccctcttcatgtttot    |
| CNV-2 | ctcccagaaccaaaggttgtctcaacttcAGTTGGTTTTTTTTTGTGTCAAGTAAATACG  | ... | CTGTCATCGACGCAACCATACACTCGAagttgactattactggggcatacacacaca  |
| CNV-3 | ataataatcgagctactcccagaaccaaagGCTGTGCTCAACTTCAGTTGTTTTTTTTTGT | ... | ACTATTACTGGGGCATAACACACACACacacacacacacacacaccattaccactc   |
| CNV-4 | caatttgactcccacacagaagacatctgtACGCGGTTTATTTAAGCTAACAACATTTGC  | ... | TACCACTCCAGCAAACAAAAGGACTGCacgcaccctcttcatgttcttagaaaat    |
| CNV-5 | ttgattaatcgactacgaaatttgagctacCAATTTGACTCCACACAGAAGACATCTGT   | ... | TGTTTTTTTCTTTCATCATCAACATCAatcaacataatcaacatcaacaaaaccattg |
| CNV-6 | cgagcttacaaccaatatcaatccgacaatCTTGTACAACAACGTATGTAGGCCCAAATA  | ... | CGTGACATTTTGTGCGCATAGACACGCatacctaccacacactccacacacacatac  |
| CNV-7 | catcaatgcaattgaaactcaacctccgacACCAACTCCACCCATTTACTCAAGTAATCA  | ... | AAAACAACAACATACGAAGCATTAATtaagctactcgatactatacgaattgtgag   |
| CNV-8 | tttttggccacaaaaaacatttgatcacCACACAAACCATTGATAACATTATCAGCGC    | ... | CACACACACACACACACACACCATTaccactccagcaacaaaaggactgcacgc     |

**Supplementary Figure S5.** Repeat sequences at (A) *RTA3* and (B) *ARR3* amplifications. Diagram showing the sequences at breakpoints for the 16 *RTA3* CNVs (A), and eight *ARR3* CNVs (B). Breakpoints are demarcated by a switch from lowercase (outside the CNV) to uppercase (covered by the CNV) and vice-versa. Text highlighted in pink shows similarity between start- and end-points
